# Supplementary material
Source: PubMed Central journal article supplement (PMC3165683)
Supplement: supp_193_18_4954__1.pdf [file supp_193_18_4954__1.pdf]

## SUPPLEMENTARY DATA

TABLE 1. Genes differently regulated in the *sigB* mutant MS64 compared to the wild type Newman.

| TIGR locus name Newman <sup>a</sup> | Gene symbol <sup>b</sup> | Description <sup>c</sup>                                          | Newman/MS64 <sup>c</sup> |
|-------------------------------------|--------------------------|-------------------------------------------------------------------|--------------------------|
| NWMN_0047                           |                          | hypothetical protein, similar to aminoacylase                     | 9.188                    |
| NWMN_0050                           |                          | myosin-cross-reactive antigen                                     | 2.286                    |
| NWMN_0057                           | <i>sirC</i>              | siderophore compound ABC transporter permease protein SirC        | 17.51                    |
| NWMN_0095                           | <i>capA</i>              | capsular polysaccharide synthesis enzyme CapA                     | 2.7795                   |
| NWMN_0096                           | <i>capB</i>              | capsular polysaccharide synthesis enzyme CapB                     | 2.7925                   |
| NWMN_0097                           | <i>capC</i>              | capsular polysaccharide synthesis enzyme CapC                     | 2.517                    |
| NWMN_0098                           | <i>capD</i>              | capsular polysaccharide synthesis enzyme CapD                     | 2.828                    |
| NWMN_0099                           | <i>capE</i>              | capsular polysaccharide synthesis enzyme CapE                     | 2.4015                   |
| NWMN_0102                           | <i>capH</i>              | capsular polysaccharide synthesis enzyme CapH                     | 2.095                    |
| NWMN_0103                           | <i>capI</i>              | capsular polysaccharide synthesis enzyme CapI                     | 2.354                    |
| NWMN_0104                           | <i>capJ</i>              | capsular polysaccharide synthesis enzyme CapJ                     | 2.059                    |
| NWMN_0105                           | <i>capK</i>              | capsular polysaccharide synthesis enzyme CapK                     | 2.099                    |
| NWMN_0107                           | <i>capM</i>              | capsular polysaccharide synthesis enzyme CapM                     | 2.087                    |
| NWMN_0135                           | <i>murQ</i>              | N-acetylmuramic acid-6-phosphate etherase                         | 0.452                    |
| NWMN_0136                           |                          | sucrose-specific PTS transporter IIBC component protein           | 0.457                    |
| NWMN_0137                           |                          | RpiR family transcriptional regulator                             | 0.417                    |
| NWMN_0162                           | <i>pflB</i>              | formate acetyltransferase                                         | 0.409                    |
| NWMN_0163                           | <i>pflA</i>              | hypothetical protein, formate acetyltransferase activating enzyme | 0.367                    |
| NWMN_0166                           | <i>coa</i>               | staphylocoagulase precursor                                       | 2.751                    |
| NWMN_0196                           | <i>lrgA</i>              | murein hydrolase regulator LrgA                                   | 0.124                    |
| NWMN_0197                           | <i>lrgB</i>              | antiholin-like protein LrgB                                       | 0.16                     |
| NWMN_0199                           |                          | PTS system, IIA component                                         | 0.418                    |
| NWMN_0200                           | <i>bglA</i>              | 6-phospho-beta-glucosidase                                        | 0.349                    |
| NWMN_0202                           | <i>rbsK</i>              | ribokinase                                                        | 0.276                    |
| NWMN_0203                           | <i>rbsD</i>              | ribose ABC transporter protein                                    | 0.293                    |
| NWMN_0204                           | <i>rbsU</i>              | ribose transporter RbsU                                           | 0.289                    |
| NWMN_0215                           |                          | hypothetical protein                                              | 0.379                    |
| NWMN_0218                           |                          | staphyloxanthin biosynthesis protein                              | 0.451                    |
| NWMN_0223                           | <i>essC</i>              | ESX-1 secretion system (Ess) protein C                            | 0.377                    |
| NWMN_0250                           |                          | ABC transporter, permease protein                                 | 4.751                    |
| NWMN_0251                           |                          | ABC transporter ATP-binding protein                               | 3.705                    |
| NWMN_0321                           |                          | oxidoreductase family protein                                     | 4.998                    |
| NWMN_0364                           |                          | hypothetical protein (lipoprotein, putative)                      | 17.88                    |
| NWMN_0374                           |                          | sodium:dicarboxylate symporter family protein                     | 0.282                    |
| NWMN_0393                           | <i>set6nm</i>            | superantigen-like protein, exotoxin NM6                           | 2.588                    |
| NWMN_0394                           | <i>set7nm</i>            | superantigen-like protein, exotoxin NM7                           | 2.231                    |
| NWMN_0396                           | <i>set9nm</i>            | superantigen-like protein, exotoxin NM9                           | 2.983                    |
| NWMN_0397                           | <i>set10nm</i>           | superantigen-like protein, exotoxin NM10                          | 2.048                    |
| NWMN_0429                           |                          | N-acetylmuramoyl-L-alanine amidase AAA precursor                  | 0.303                    |
| NWMN_0459                           | <i>purR</i>              | pur operon repressor                                              | 3.658                    |
| NWMN_0460                           | <i>yabJ</i>              | similar to translation initiation inhibitor                       | 3.565                    |
| NWMN_0461                           | <i>spoVG</i>             | regulatory protein SpoVG                                          | 4.127                    |
| NWMN_0513                           |                          | chaperone protein HchA                                            | 4.875                    |
| NWMN_0525                           | <i>sdrE</i>              | bone sialoprotein-binding protein                                 | 0.399                    |
| NWMN_0533                           |                          | hypothetical protein, hexulose-6-phosphate synthase, putative     | 3.198                    |
| NWMN_0555                           | <i>mvaK2</i>             | phosphomevalonate kinase                                          | 4.522                    |
| NWMN_0587                           |                          | hypothetical protein                                              | 57.63                    |
| NWMN_0588                           | <i>sarA</i>              | staphylococcal accessory regulator A                              | 2.127                    |
| NWMN_0592                           |                          | site-specific recombinase                                         | 21.55                    |
| NWMN_0593                           | <i>mnhA</i>              | putative monovalent cation/H <sup>+</sup> antiporter subunit A    | 8.329                    |
| NWMN_0594                           | <i>mnhB</i>              | putative monovalent cation/H <sup>+</sup> antiporter subunit B    | 4.749                    |
| NWMN_0595                           | <i>mnhC</i>              | putative monovalent cation/H <sup>+</sup> antiporter subunit C    | 9.65                     |
| NWMN_0596                           | <i>mnhD</i>              | putative monovalent cation/H <sup>+</sup> antiporter subunit D    | 7.188                    |
| NWMN_0597                           | <i>mnhE</i>              | putative monovalent cation/H <sup>+</sup> antiporter subunit E    | 5.684                    |
| NWMN_0598                           | <i>mnhF</i>              | putative monovalent cation/H <sup>+</sup> antiporter subunit F    | 6.812                    |
| NWMN_0599                           | <i>mnhG</i>              | putative monovalent cation/H <sup>+</sup> antiporter subunit G    | 4.752                    |
| NWMN_0624                           | <i>lipA</i>              | lipase/esterase LipA                                              | 2.185                    |
| NWMN_0651                           |                          | hypothetical protein                                              | 9.587                    |
| NWMN_0695                           |                          | hypothetical protein                                              | 9.395                    |
| NWMN_0696                           |                          | di-/tripeptide ABC transporter                                    | 0.452                    |
| NWMN_0740                           | <i>gapR</i>              | glycolytic operon regulator                                       | 3.436                    |
| NWMN_0756                           | <i>clfA</i>              | clumping factor A                                                 | 21.96                    |
| NWMN_0763                           |                          | hypothetical protein                                              | 3.118                    |
| NWMN_0771                           |                          | OsmC-like protein                                                 | 12.81                    |
| NWMN_0783                           | <i>csbD</i>              | CsbD-like superfamily protein                                     | 24.35                    |
| NWMN_0786                           | <i>sufD</i>              | FeS assembly protein SufD                                         | 2.232                    |

TABLE 1. continued.

| TIGR locus name<br>Newman <sup>a</sup> | Gene<br>symbol <sup>b</sup> | Description <sup>b</sup>                                                            | Newman/<br>MS64 <sup>c</sup> |
|----------------------------------------|-----------------------------|-------------------------------------------------------------------------------------|------------------------------|
| NWMN_0791                              |                             | hypothetical protein                                                                | 3.146                        |
| NWMN_0792                              |                             | hypothetical protein                                                                | 2.877                        |
| NWMN_0851                              |                             | truncated MHC class II analog protein                                               | 0.309                        |
| NWMN_0892                              | <i>htrA</i>                 | serine protease HtrA                                                                | 2.268                        |
| NWMN_0906                              |                             | glycosyl transferase, group 1 family protein                                        | 2.015                        |
| NWMN_0918                              | <i>sspA</i>                 | V8 protease, glutamyl endopeptidase precursor                                       | 0.423                        |
| NWMN_0920                              |                             | hypothetical protein                                                                | 2.305                        |
| NWMN_0922                              | <i>atl</i>                  | bifunctional autolysin precursor                                                    | 0.422                        |
| NWMN_0927                              | <i>qoxD</i>                 | quinol oxidase polypeptide IV                                                       | 0.42                         |
| NWMN_0952                              | <i>cydA</i>                 | cytochrome D ubiquinol oxidase, subunit I                                           | 2.276                        |
| NWMN_0959                              | <i>pdhA</i>                 | pyruvate dehydrogenase E1 component, alpha subunit                                  | 0.468                        |
| NWMN_0979                              | <i>pycA</i>                 | pyruvate carboxylase                                                                | 0.378                        |
| NWMN_1058                              | <i>uvrC</i>                 | excinuclease ABC subunit C                                                          | 2.258                        |
| NWMN_1073                              | <i>hla</i>                  | alpha-hemolysin precursor                                                           | 0.239                        |
| NWMN_1077                              |                             | superantigen-like protein                                                           | 2.044                        |
| NWMN_1109                              | <i>pyrR</i>                 | bifunctional pyrimidine regulatory protein PyrR uracil<br>phosphoribosyltransferase | 0.444                        |
| NWMN_1110                              | <i>uraA</i>                 | uracil permease                                                                     | 0.27                         |
| NWMN_1111                              | <i>pyrB</i>                 | aspartate carbamoyltransferase catalytic subunit                                    | 0.206                        |
| NWMN_1112                              | <i>pyrC</i>                 | dihydroorotase                                                                      | 0.237                        |
| NWMN_1113                              | <i>carA</i>                 | carbamoyl phosphate synthase small subunit                                          | 0.221                        |
| NWMN_1114                              | <i>carB</i>                 | carbamoyl phosphate synthase large subunit                                          | 0.307                        |
| NWMN_1115                              | <i>pyrF</i>                 | orotidine 5'-phosphate decarboxylase                                                | 0.303                        |
| NWMN_1116                              | <i>pyrE</i>                 | orotate phosphoribosyltransferase                                                   | 0.298                        |
| NWMN_1180                              | <i>truB</i>                 | tRNA pseudouridine synthase B                                                       | 2.377                        |
| NWMN_1314                              |                             | hypothetical protein                                                                | 2.245                        |
| NWMN_1328                              | <i>ariR</i>                 | two-component response regulator                                                    | 2.125                        |
| NWMN_1397                              |                             | hypothetical protein                                                                | 0.347                        |
| NWMN_1508                              | <i>accB</i>                 | acetyl-CoA carboxylase, biotin carboxyl carrier protein                             | 2.603                        |
| NWMN_1509                              |                             | urea amidolyase-related protein                                                     | 2.776                        |
| NWMN_1526                              |                             | hypothetical protein                                                                | 42.57                        |
| NWMN_1552                              |                             | hypothetical protein                                                                | 2.389                        |
| NWMN_1560                              | <i>abrB</i>                 | ammonia monooxygenase                                                               | 3.322                        |
| NWMN_1575                              | <i>lysP</i>                 | lysine-specific permease                                                            | 7.196                        |
| NWMN_1600                              |                             | universal stress protein family protein                                             | 0.318                        |
| NWMN_1603                              | <i>ald2</i>                 | alanine dehydrogenase                                                               | 0.486                        |
| NWMN_1605                              | <i>ackA</i>                 | acetate kinase                                                                      | 0.491                        |
| NWMN_1631                              |                             | hypothetical protein                                                                | 3.062                        |
| NWMN_1698                              |                             | hypothetical protein                                                                | 2.319                        |
| NWMN_1701                              | <i>spIF</i>                 | serine protease SplF                                                                | 0.271                        |
| NWMN_1702                              | <i>spIE</i>                 | serine protease SplE                                                                | 0.132                        |
| NWMN_1703                              | <i>spID</i>                 | serine protease SplD                                                                | 0.121                        |
| NWMN_1704                              | <i>spIC</i>                 | serine protease SplC                                                                | 0.204                        |
| NWMN_1705                              | <i>spIB</i>                 | serine protease SplB                                                                | 0.187                        |
| NWMN_1706                              | <i>spIA</i>                 | serine protease SplA                                                                | 0.215                        |
| NWMN_1709                              | <i>bsaG</i>                 | lantibiotic ABC transporter protein                                                 | 2.5715                       |
| NWMN_1710                              | <i>bsaE</i>                 | lantibiotic ABC transporter protein                                                 | 2.48                         |
| NWMN_1711                              | <i>bsaF</i>                 | lantibiotic immunity protein F                                                      | 3.904                        |
| NWMN_1718                              | <i>lukD</i>                 | leukocidin LukD precursor                                                           | 0.0656                       |
| NWMN_1719                              | <i>lukE</i>                 | leukocidin LukE precursor                                                           | 0.0727                       |
| NWMN_1731                              |                             | hypothetical protein                                                                | 0.275                        |
| NWMN_1738                              |                             | hypothetical protein                                                                | 2.95                         |
| NWMN_1767                              |                             | ThiJ/Pfpl family protein                                                            | 5.071                        |
| NWMN_1819                              |                             | low molecular weight phosphotyrosine protein phosphatase                            | 2.774                        |
| NWMN_1821                              |                             | ribonuclease BN                                                                     | 8.346                        |
| NWMN_1847                              | <i>sspB (2)</i>             | staphopain thiol proteinase                                                         | 0.263                        |
| NWMN_1927                              | <i>lukF</i>                 | leukocidin/hemolysin toxin subunit F                                                | 0.231                        |
| NWMN_1928                              | <i>lukS</i>                 | leukocidin/hemolysin toxin subunit S                                                | 0.242                        |
| NWMN_1968                              |                             | metallopeptidase SprT family protein                                                | 0.0777                       |
| NWMN_1969                              |                             | S1 RNA-binding domain-containing protein                                            | 0.0639                       |
| NWMN_1970                              | <i>sigB</i>                 | RNA polymerase sigma factor SigB                                                    | 2.579                        |
| NWMN_1971                              | <i>rsbW</i>                 | serine-protein kinase RsbW, anti-sigma B factor                                     | 2.573                        |
| NWMN_1972                              | <i>rsbV</i>                 | anti-sigma B factor antagonist                                                      | 2.695                        |
| NWMN_1999                              |                             | sceD protein, putative                                                              | 2.909                        |
| NWMN_2004                              | <i>murA</i>                 | UDP-N-acetylglucosamine 1-carboxyvinyltransferase 1                                 | 2.211                        |
| NWMN_2005                              |                             | hypothetical protein                                                                | 3.196                        |
| NWMN_2026                              |                             | aldehyde dehydrogenase family protein                                               | 7.298                        |
| NWMN_2048                              |                             | hypothetical protein                                                                | 30.95                        |
| NWMN_2057                              | <i>mtlF</i>                 | PTS system, mannitol-specific IIBC component                                        | 15.41                        |
| NWMN_2058                              |                             | transcriptional antiterminator BglG family protein                                  | 7.412                        |

TABLE 1. continued.

| TIGR locus name<br>Newman <sup>a</sup> | Gene<br>symbol <sup>b</sup>  | Description <sup>b</sup>                                           | Newman/<br>MS64 <sup>c</sup> |
|----------------------------------------|------------------------------|--------------------------------------------------------------------|------------------------------|
| NWMN_2059                              | <i>mtlA</i>                  | mannitol-specific IIA component                                    | 17.38                        |
| NWMN_2059                              | <i>mtlA</i>                  | mannitol-specific IIA component                                    | 17.38                        |
| NWMN_2060                              | <i>mtlD</i>                  | mannitol-1-phosphate 5-dehydrogenase                               | 6.271                        |
| NWMN_2079                              |                              | hypothetical protein                                               | 2.27                         |
| NWMN_2086                              | <i>asp23</i>                 | alkaline shock protein 23                                          | 33.94                        |
| NWMN_2087                              |                              | hypothetical protein                                               | 114.5                        |
| NWMN_2088                              |                              | hypothetical protein                                               | 301.8                        |
| NWMN_2089                              | <i>opuD2</i>                 | osmoprotectant transporter                                         | 115.4                        |
| NWMN_2109                              |                              | truncated MHC class II analog protein                              | 16.94                        |
| NWMN_2186                              |                              | acyl-CoA dehydrogenase-related protein                             | 2.037                        |
| NWMN_2197                              | <i>sarY</i>                  | staphylococcal accessory regulator Y                               | 2.688                        |
| NWMN_2198                              |                              | transcriptional regulator AraC family protein                      | 4.188                        |
| NWMN_2201                              |                              | dehydrogenase family protein                                       | 2.399                        |
| NWMN_2229                              |                              | oxidoreductase, short chain dehydrogenase/reductase family protein | 12.26                        |
| NWMN_2235                              | <i>hutG</i>                  | formimidoylglutamase                                               | 2.067                        |
| NWMN_2242                              |                              | ABC transporter ATP-binding protein                                | 0.403                        |
| NWMN_2258                              | <i>tcaR</i>                  | teicoplanin resistance operon transcriptional regulator TcaR       | 2.208                        |
| NWMN_2268                              |                              | L-lactate permease 2                                               | 0.351                        |
| NWMN_2282                              |                              | hypothetical protein                                               | 2.863                        |
| NWMN_2308                              | <i>dsbA</i>                  | protein-disulfide isomerase                                        | 2.172                        |
| NWMN_2318                              | <i>hlgA</i>                  | gamma-hemolysin component A                                        | 0.41                         |
| NWMN_2319                              | <i>hlgC</i>                  | gamma hemolysin component C                                        | 0.221                        |
| NWMN_2320                              | <i>hlgB</i>                  | gamma hemolysin component B                                        | 0.167                        |
| NWMN_2321                              | <i>bioX</i>                  | biotin biosynthesis-related protein                                | 0.31                         |
| NWMN_2334                              |                              | hypothetical protein                                               | 3.01                         |
| NWMN_2352                              |                              | hypothetical protein                                               | 13.93                        |
| NWMN_2353                              |                              | ABC transporter ATP-binding protein                                | 37.71                        |
| NWMN_2360                              | <i>opp1F</i>                 | peptide ABC transporter, ATP-binding protein                       | 0.48                         |
| NWMN_2371                              |                              | alkylhydroperoxidase AhpD family protein                           | 87.59                        |
| NWMN_2399                              | <i>fnbA</i>                  | fibronectin binding protein A precursor                            | 2.586                        |
| NWMN_2406                              |                              | hypothetical protein                                               | 14.15                        |
| NWMN_2422                              |                              | D-isomer specific 2-hydroxyacid dehydrogenase                      | 2.992                        |
| NWMN_2438                              | <i>poxB</i>                  | pyruvate oxidase                                                   | 29.46                        |
| NWMN_2439                              | <i>cidB</i>                  | holin-like protein CidB                                            | 47.4                         |
| NWMN_2440                              | <i>cidA</i>                  | holin-like protein CidA                                            | 3.039                        |
| NWMN_2441                              |                              | LysR family regulatory protein                                     | 2.411                        |
| NWMN_2448                              | <i>clpC</i>                  | ATP-dependent Clp protease, ATP-binding subunit ClpC               | 2.174                        |
| NWMN_2450                              | <i>feoB</i>                  | ferrous iron transport protein B                                   | 2.834                        |
| NWMN_2456                              |                              | hypothetical protein                                               | 2.355                        |
| NWMN_2461                              | <i>crtN</i>                  | squalene synthase                                                  | 5.443                        |
| NWMN_2462                              | <i>crtM</i>                  | squalene desaturase                                                | 8.444                        |
| NWMN_2463                              |                              | glycosyl transferase, group 2 family protein                       | 23.55                        |
| NWMN_2464                              |                              | phytoene dehydrogenase                                             | 33.45                        |
| NWMN_2465                              | <i>crtI</i>                  | hypothetical protein                                               | 53.23                        |
| NWMN_2466                              | <i>oatA</i>                  | secretory antigen precursor SsaA homolog                           | 2.232                        |
| NWMN_2479                              |                              | amidohydrolase family protein                                      | 9.656                        |
| NWMN_2480                              |                              | hydrolase, alpha/beta fold family                                  | 22.72                        |
| NWMN_2512                              |                              | metallo-beta-lactamase superfamily protein                         | 5.215                        |
| NWMN_2534                              | <i>arcA</i>                  | arginine deiminase                                                 | 0.474                        |
| NWMN_2547                              |                              | glycosyl transferase, group 1 family protein                       | 2.199                        |
| NWMN_2551                              |                              | accessory secretory protein Asp1                                   | 0.465                        |
| NWMN_2556                              |                              | hypothetical protein                                               | 2.257                        |
| NWMN_2557                              |                              | hypothetical protein                                               | 12.66                        |
| NWMN_2569                              | <i>geh</i>                   | lipase precursor                                                   | 0.266                        |
| NWMN_2582                              |                              | ABC transporter ATP-binding protein                                | 2.226                        |
| NWMN_2594                              |                              | hypothetical protein                                               | 29.49                        |
| NWMN_2595                              | <i>nixA</i> ,<br><i>hoxN</i> | high-affinity nickel transporter                                   | 8.822                        |
| NWMN_2606                              |                              | hypothetical protein                                               | 0.39                         |

<sup>a</sup> Locus number for *S. aureus* Newman (<http://www.tigr.org>).

<sup>b</sup> Gene symbol and description of the gene based on the TIGR annotation (<http://www.tigr.org>).

<sup>c</sup> Fold change of gene transcription comparing *S. aureus* Newman with MS64.
